# Supplementary material for: Chronic nigral neuromodulation aggravates behavioral deficits and synaptic changes in an α-synuclein based rat model for Parkinson’s disease
Source: PubMed Central journal article supplement (PMC6805517; doi:10.1186/s40478-019-0814-3), 2019-10-22

# Supplementary Figure 1

A.

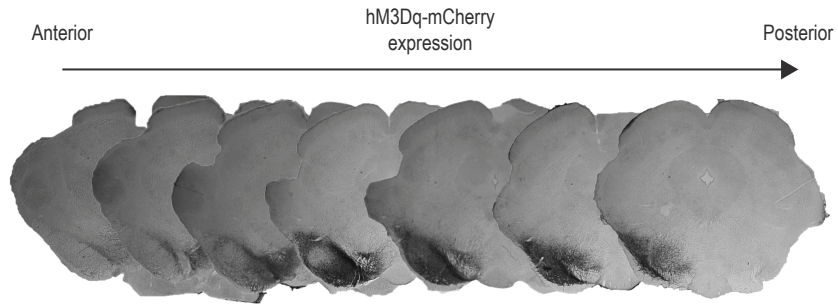

B.

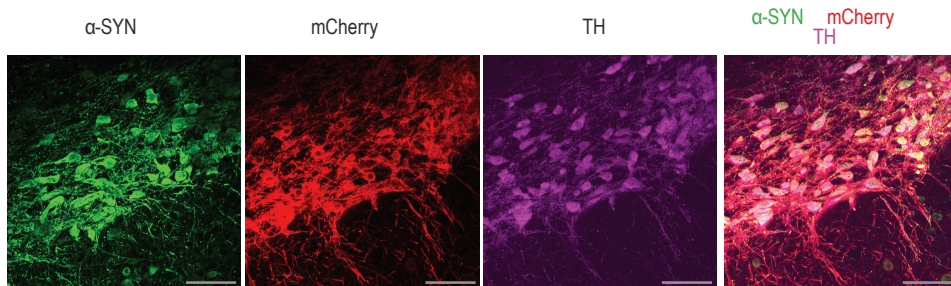

C.

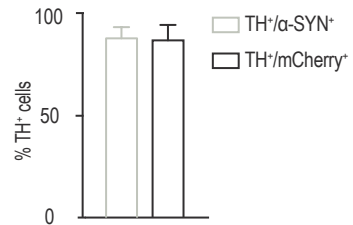

# Supplementary Figure 2.

A.

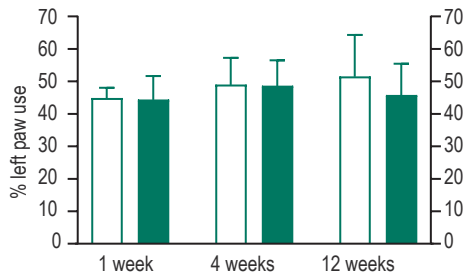

B.

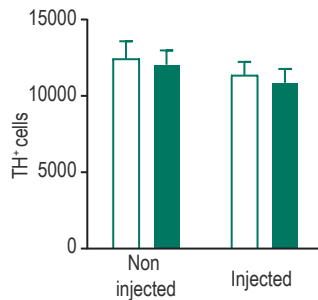

C.

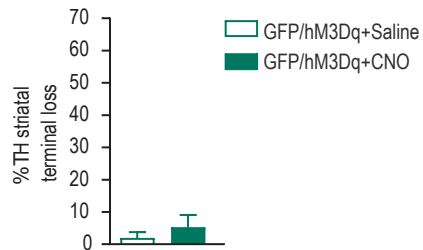

D.

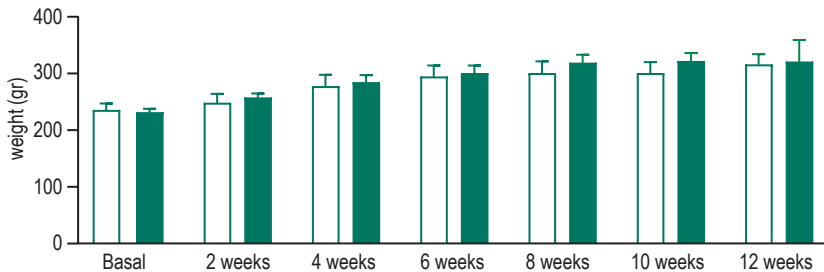



Supplementary Figure 3.  
Uncut Western blot Figure 4. A

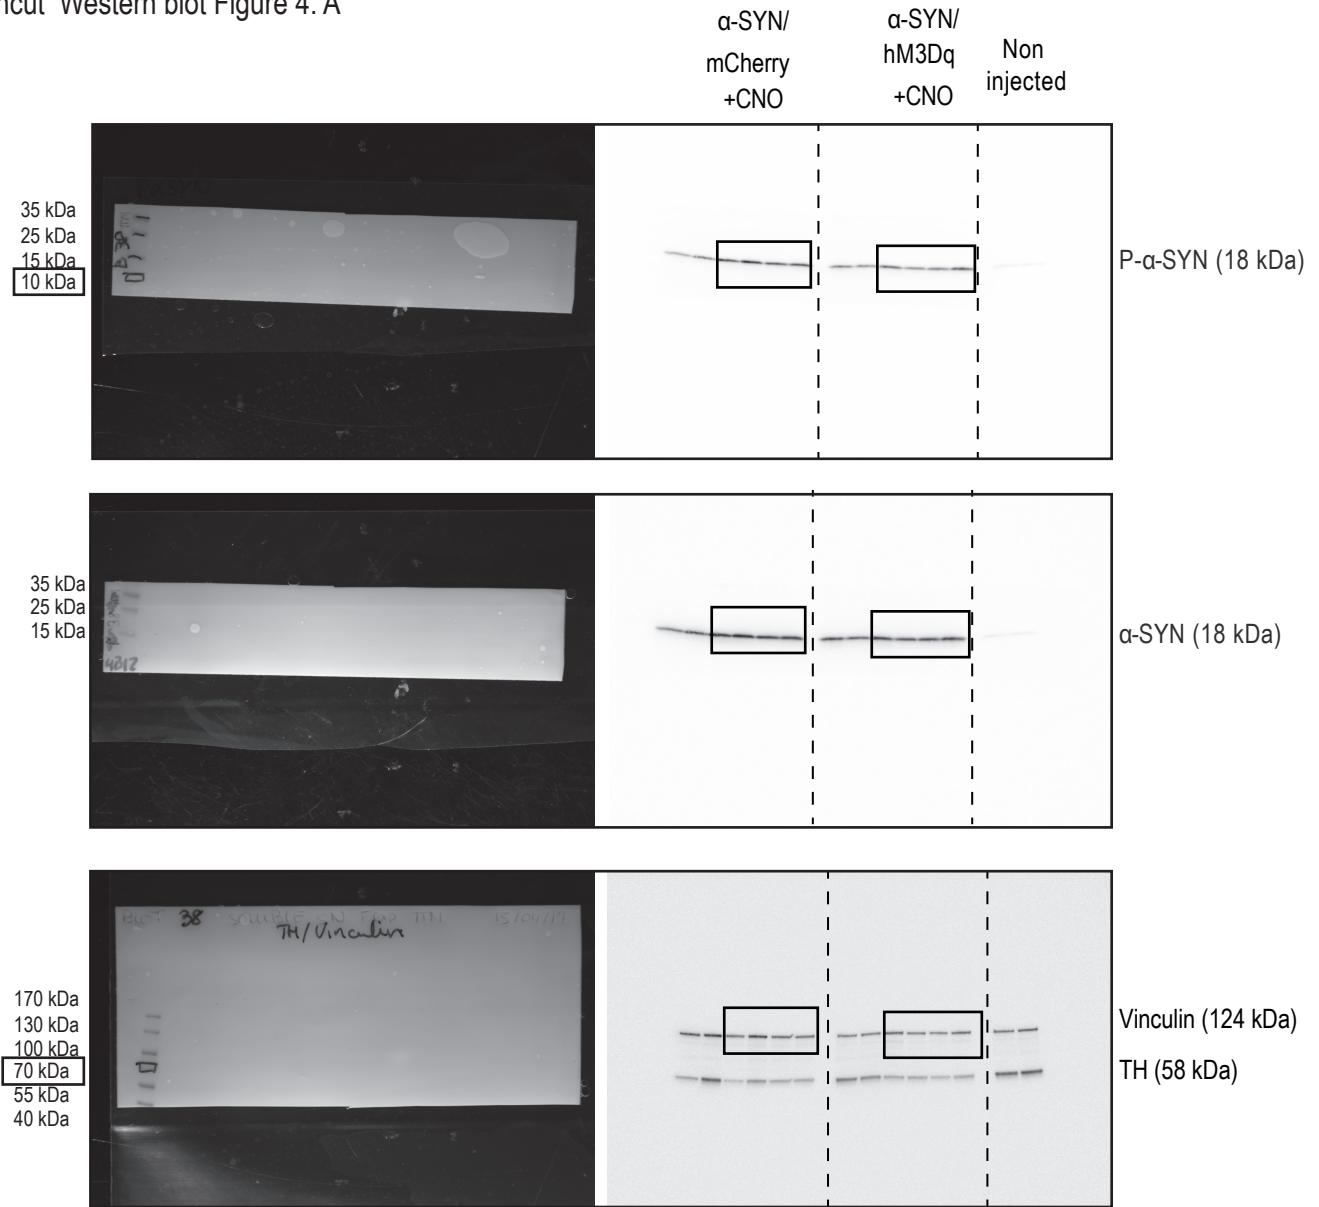

Uncut Western blot Figure 4. E

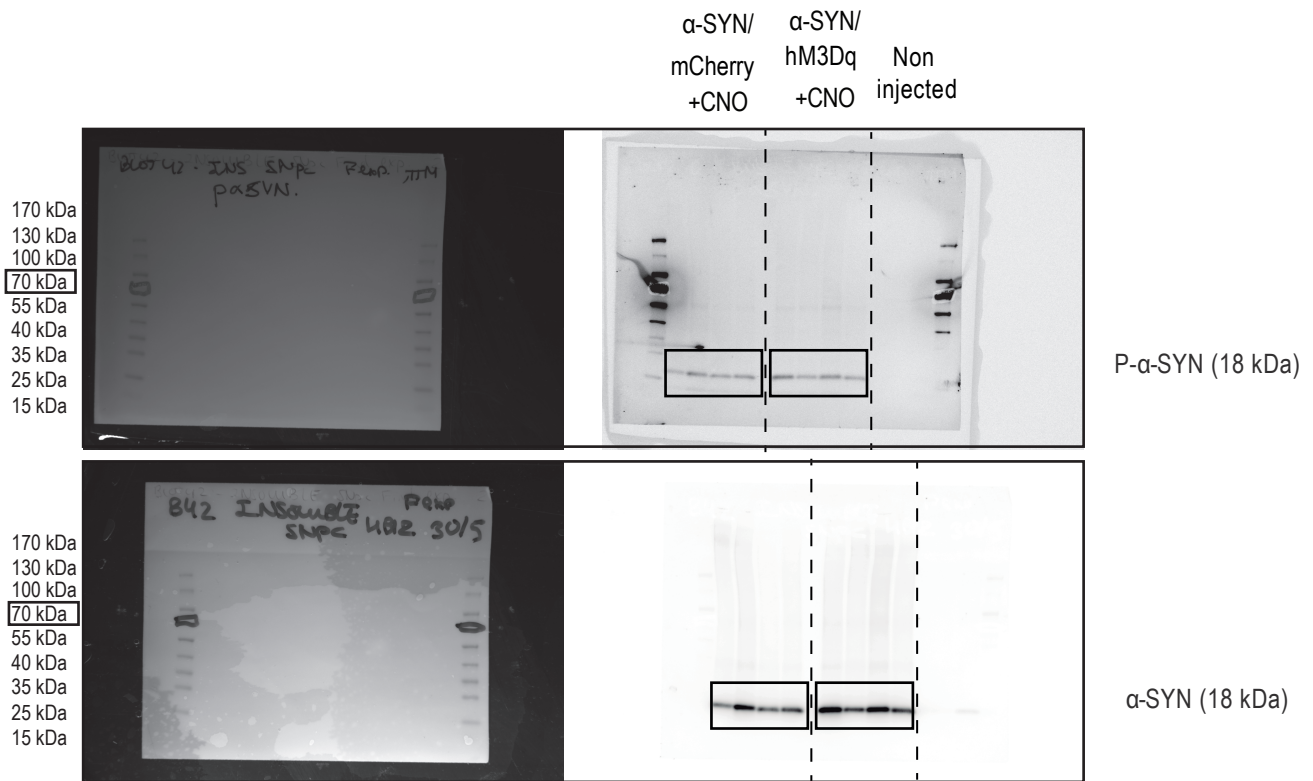

Uncut Western blot Figure 4. M

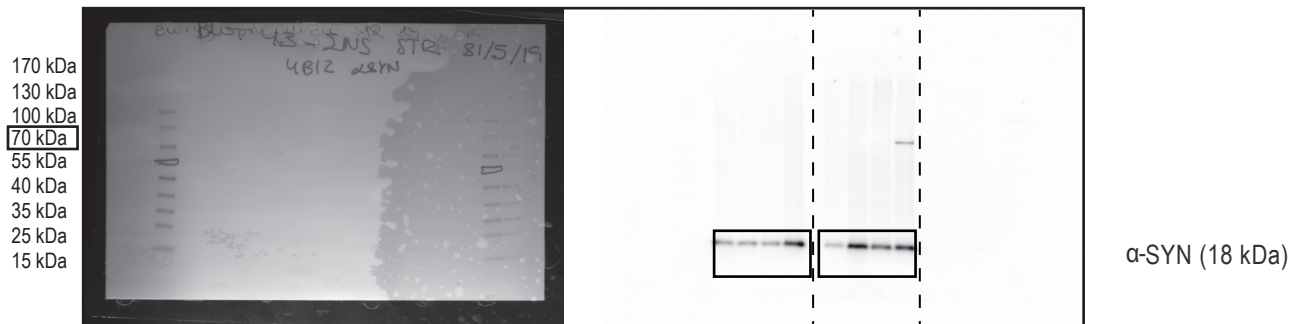

Uncut Western blot Figure 4. I

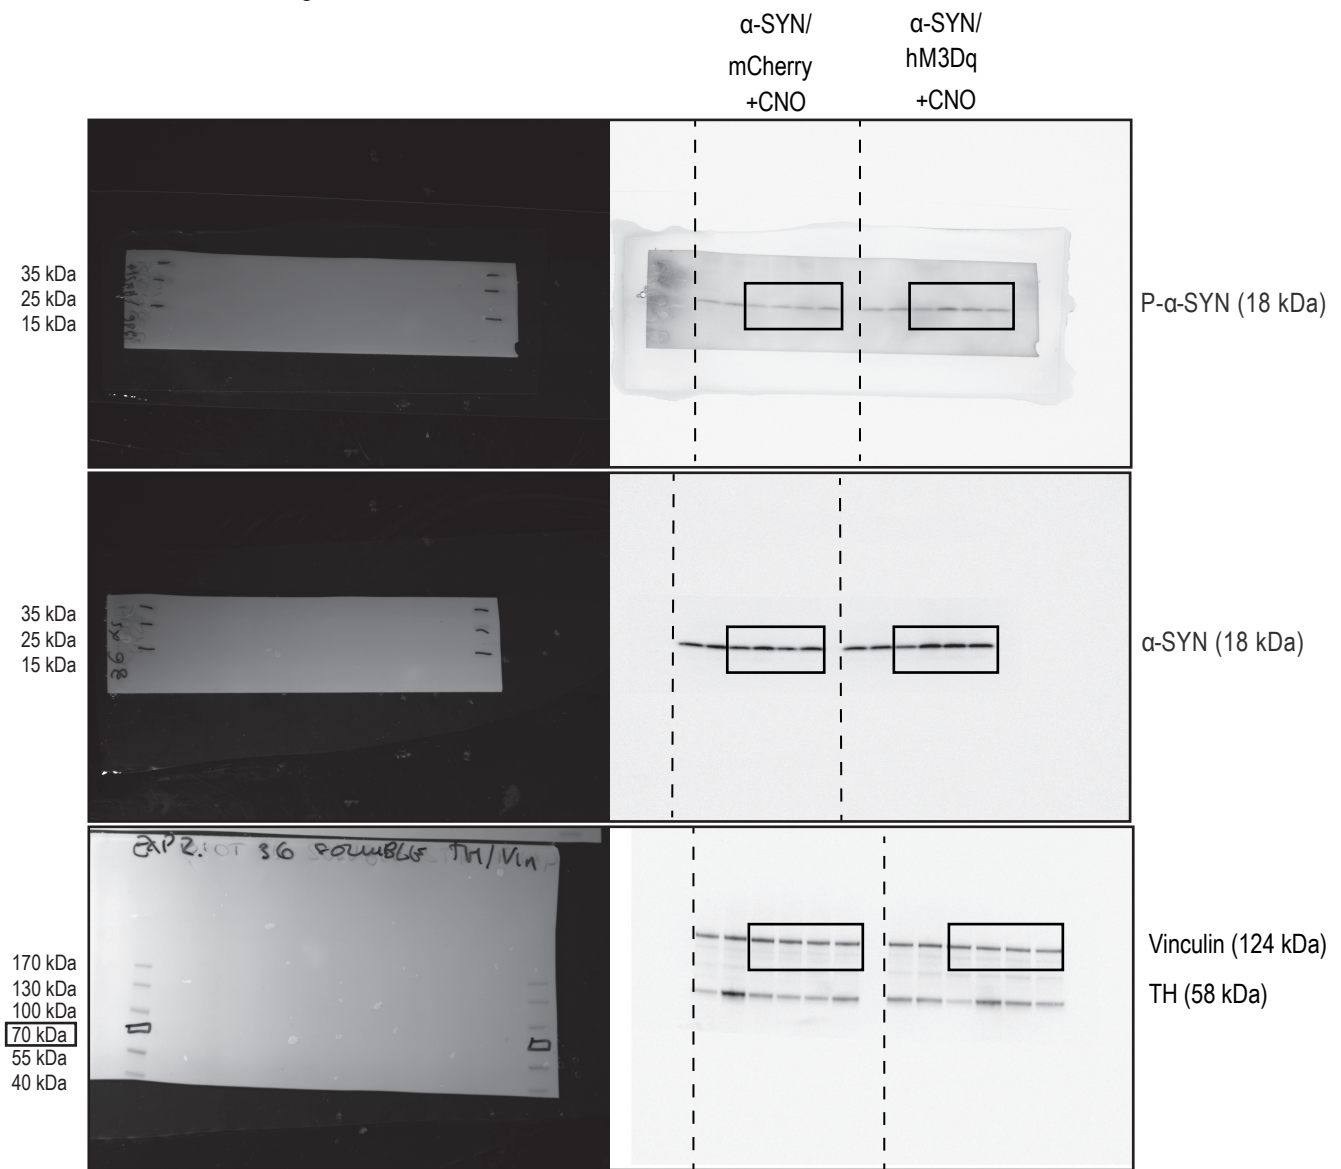

Supplementary Figure 4.

Uncut Western blot Figure 5. A

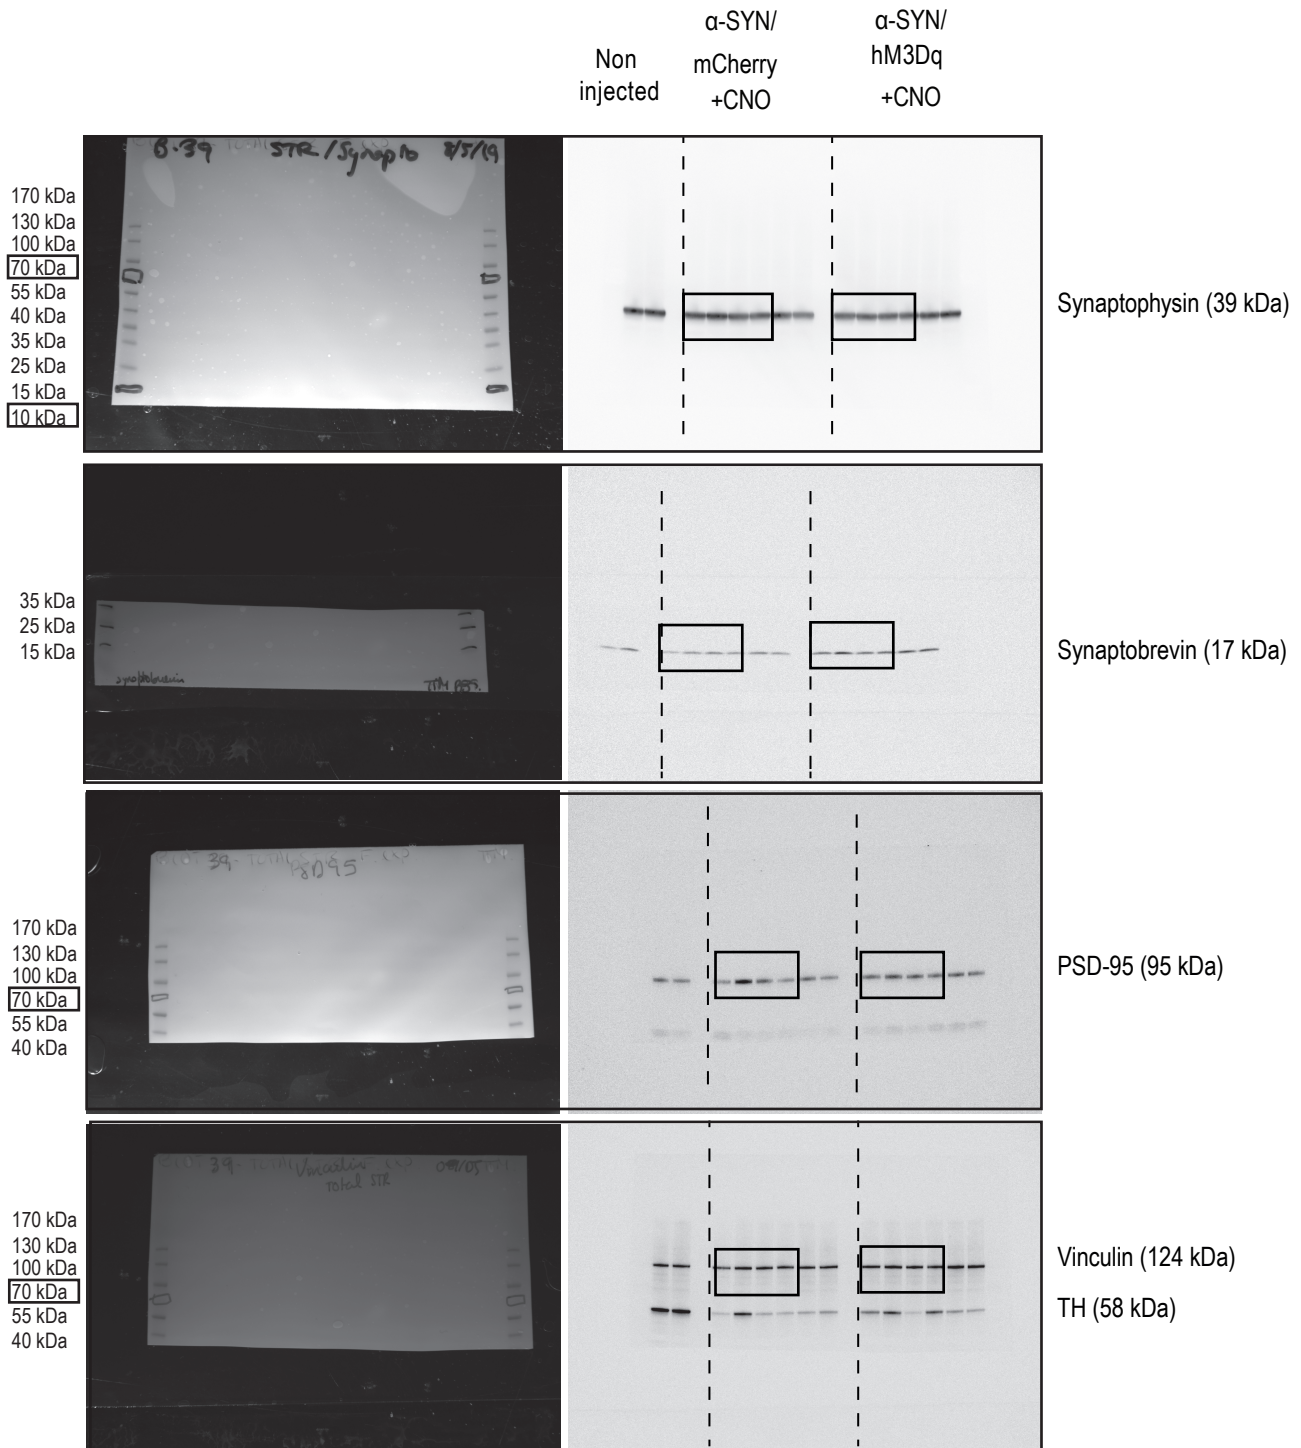

Supplement: 40478_2019_814_MOESM1_ESM.pdf [file 40478_2019_814_MOESM1_ESM.pdf]
